# Supplementary material for: Early nerve fibre regeneration in individuals with type 1 diabetes after simultaneous pancreas and kidney transplantation
Source: Springer Nature journal article supplement (doi:10.1007/s00125-019-4897-y), 2019-06-07
Supplement: MOESM1 [file 16780992]

**ESM Table 1. Demographic data and Neuropathy Assessment in those who were followed up for 36 months vs those who were lost to follow up.**

|                                                         | <b>Lost to FU at<br/>36 months<br/>(n=21)</b> | <b>FU<br/>(n=15)</b>     | <b>P</b> |
|---------------------------------------------------------|-----------------------------------------------|--------------------------|----------|
| <b>Age (Years)</b>                                      | 44.2±9.9                                      | 44.2±8.5                 | 0.8      |
| <b>Duration of Diabetes<br/>(years)</b>                 | 27.8±11.2                                     | 28.3±9.6                 | 0.9      |
| <b>Blood Pressure<br/>systolic/diastolic<br/>(mmHg)</b> | 130.9±22.4 /<br>71.9±12.5                     | 118.9±13.5<br>/ 70.1±7.3 | 0.07/0.4 |
| <b>BMI (kg/m<sup>2</sup>)</b>                           | 24.2±3.5                                      | 24.2±3.4                 | 0.9      |
| <b>HbA1c (mmol/mol)</b>                                 | 63.5±9.2                                      | 64.4±8.3                 | 0.2      |
| <b>Cholesterol<br/>(mmol/l)</b>                         | 4.3±0.9                                       | 3.8±0.5                  | 0.2      |
| <b>HDL-C (mmol/l)</b>                                   | 1.4±0.3                                       | 1.2±0.2                  | 0.2      |
| <b>LDL-C (mmol/l)</b>                                   | 2.1±0.7                                       | 1.9±0.7                  | 0.3      |
| <b>Triglycerides<br/>(mmol/l)</b>                       | 1.2±0.4                                       | 1.2±0.4                  | 0.7      |
| <b>NDS</b>                                              | 5.9±3.3                                       | 4.6±3.7                  | 0.2      |
| <b>NSP</b>                                              | 6.7±6.7                                       | 4.7±2.7                  | 0.1      |
| <b>VPT (volts)</b>                                      | 26.1±12.5                                     | 19.9±13.3                | 0.09     |
| <b>Sural Amplitude<br/>(µV)</b>                         | 2.8±2.8                                       | 2.7±2.6                  | 0.9      |
| <b>Sural Velocity (m/s)</b>                             | 34.2±8.4                                      | 36.2±7.6                 | 0.6      |
| <b>Peroneal Amplitude<br/>(mV)</b>                      | 1.4±1.2                                       | 1.2±1.5                  | 0.6      |
| <b>Peroneal Velocity<br/>(m/s)</b>                      | 32.4±8.6                                      | 31.2±9.6                 | 0.8      |
| <b>Cold Threshold (°C)</b>                              | 13.4±11.4                                     | 21.2±8.0                 | 0.1      |
| <b>Warm Threshold<br/>(°C)</b>                          | 44.7±4.1                                      | 42.7±6.2                 | 0.4      |
| <b>DB-HRV (beats/min)</b>                               | 12.2±7.1                                      | 14.4±6.4                 | 0.2      |
| <b>CNFD (no./mm<sup>2</sup>)</b>                        | 9.9±6.3                                       | 8.4±5.4                  | 0.6      |

---

|                                  |          |         |      |
|----------------------------------|----------|---------|------|
| <b>CNBD (no./mm<sup>2</sup>)</b> | 10.1±8.8 | 9.0±8.8 | 0.8  |
| <b>CNFL (mm/mm<sup>2</sup>)</b>  | 7.3±2.9  | 7.3±3.2 | 1.0  |
| <b>IENFD (no./mm)</b>            | 1.8±2.7  | 2.7±1.2 | 0.06 |

---
